# Supplementary material for: Enhanced thermoelectric performance in a percolated bismuth sulfide composite
Source: Royal Society of Chemistry journal article supplement (doi:10.1039/c6ra21418e), 2016-01-01
Supplement: c6ra21418e1.pdf [file c6ra21418e1.pdf]

## Electronic Supplementary Information

### Enhanced Thermoelectric Performance in Percolated Bismuth Sulfide Composite

Deniz P. Wong<sup>a,‡</sup>, Wei-Lun Chien<sup>a,c,‡</sup>, Chien-Yu Huang<sup>a,b</sup>, Cheng-en Chang<sup>a,c</sup>, Abhijit Ganguly<sup>b</sup>,

Lian-Ming Lyu<sup>a</sup>, Jih-Shang Hwang<sup>c</sup>, Li-Chyong Chen<sup>b\*</sup> and Kuei-Hsien Chen<sup>c\*</sup>

<sup>a</sup>Institute of Atomic and Molecular Sciences, Academia Sinica, Taipei, Taiwan

<sup>b</sup>Center for Condensed Matter Sciences, National Taiwan University, Taipei, Taiwan

<sup>c</sup>Institute of Optoelectronic Sciences, National Taiwan Ocean University, Keelung, Taiwan

‡ contributed equally

E-mail:

Contents:

1. Additional SEM images
2. Electrical properties

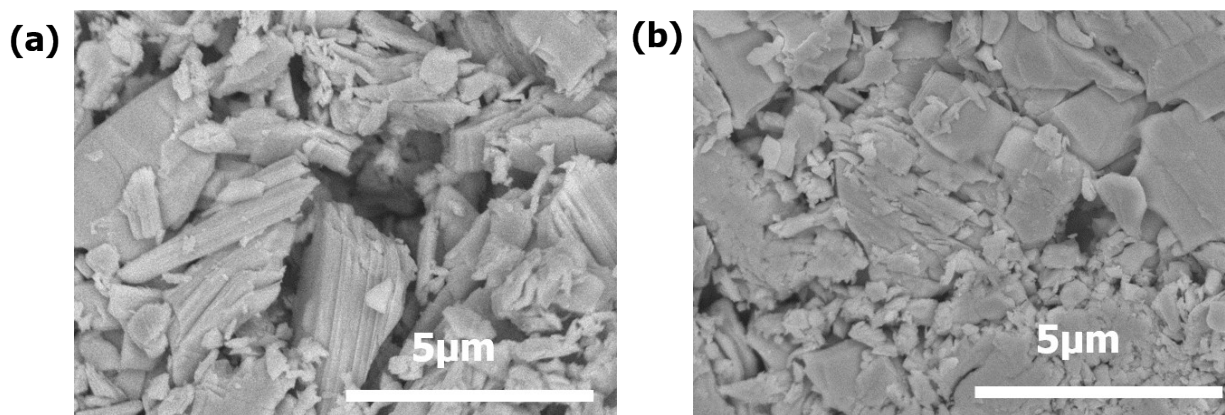

Figure S1. Scanning electron micrographs of (a) commercial Bi<sub>2</sub>S<sub>3</sub> and (b) Bismuth-rich Bi<sub>2</sub>S<sub>3</sub> from the hydrothermal method.

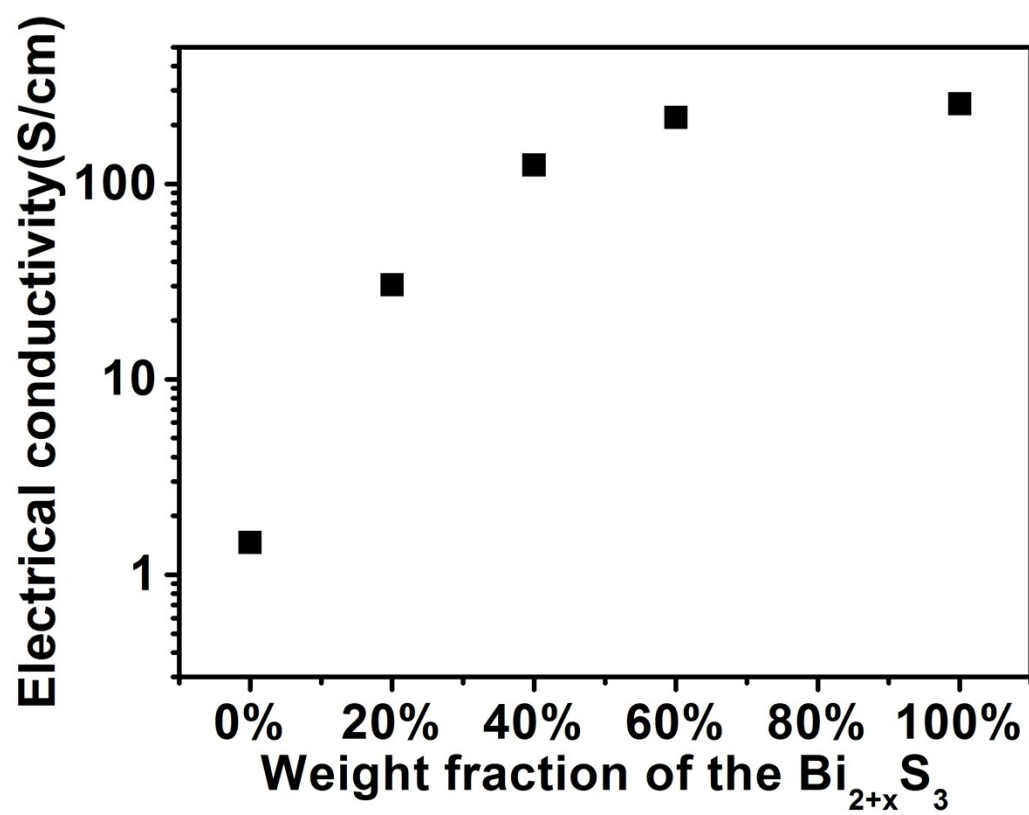

Figure S2. Electrical conductivity of Bi<sub>2</sub>S<sub>3</sub> composites at 523 K based on various weight ratio of the Bismuth-rich Bi<sub>2</sub>S<sub>3</sub> material.

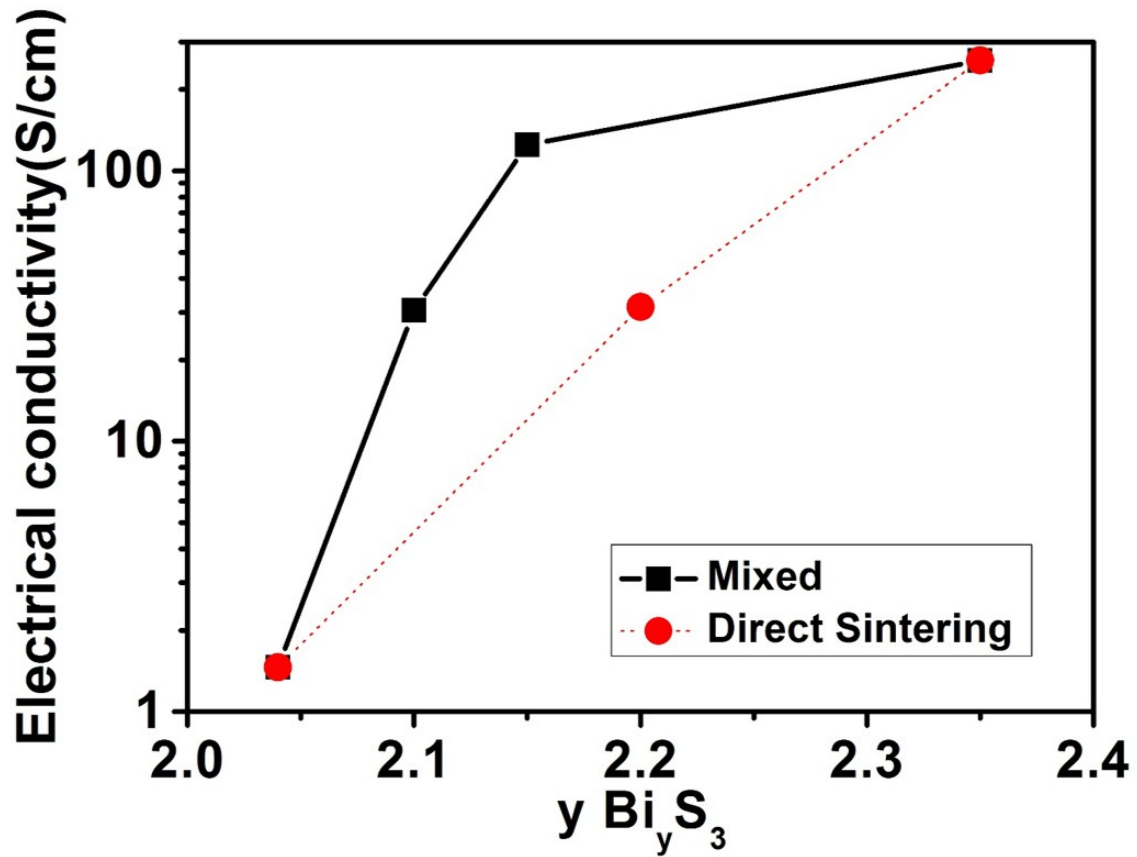

Figure S3. Comparison of electrical conductivity of  $\text{Bi}_2\text{S}_3$  composites and directly-sintered  $\text{Bi}_2\text{S}_3$  sample.
